# Supplementary material
Source: publisher figshare collection journal article supplement (https://acs.figshare.com/ndownloader/files/9981724)
Supplement: Supplementary file 1 [file 9981724]

## Sheet: CK-724-VS-T-724_D9H-CK-VS-D9H-T
Table S5- Proteins whose abundance changed in Jing724 and D9H seedlings.
ProteinID	CK-724-1_116	T-724-1_114	D9H-CK-1_115	D9H-T-1_113	CK-724-2_116	T-724-2_114	D9H-CK-2_115	D9H-T-2_113	CK-724-3_116	T-724-3_114	D9H-CK-3_115	D9H-T-3_113	Symbol	log2_FC(T-724/CK-724)	Pvalue	fdr	log2_FC(D9H-T/D9H-CK)	Pvalue	fdr	Description	KEGG_A_class	KEGG_B_class	Pathway	K_ID	GO Component	GO Function	GO Process
GRMZM2G020940_P01	1	1.329	0.607	0.736	1	1.24	0.492	0.675	1	1.369	0.621	0.816	GRMZM2G020940	0.392501	0.0114903	0.214422	0.372693	0.0187414	0.127808	Os03g0327600 [Oryza sativa Japonica Group]	-	-	-	-	-	-	-
GRMZM2G028104_P01	1	0.751	1.25	0.671	1	0.864	1.275	0.712	1	0.758	1.332	0.723	GRMZM2G028104	-0.33825	0.0347112	0.284181	-0.872974	0.000377514	0.0654081	PREDICTED: 3-N-debenzoyl-2-deoxytaxol N-benzoyltransferase isoform X1 [Zea mays]	-	-	-	-	-	GO:0003824//catalytic activity;GO:0016746//transferase activity, transferring acyl groups;GO:0016740//transferase activity	-
GRMZM2G032003_P02	1	1.17	0.796	0.963	1	1.25	0.806	1.05	1	1.19	0.805	0.94	GRMZM2G032003	0.267036	0.0113365	0.214422	0.294945	0.0242284	0.128763	TPA: UDP-glucose pyrophosphorylase1 [Zea mays]	Metabolism	Carbohydrate metabolism	ko00500//Starch and sucrose metabolism;ko00520//Amino sugar and nucleotide sugar metabolism;ko00040//Pentose and glucuronate interconversions;ko00052//Galactose metabolism	K00963	GO:0042995//cell projection;GO:0016020//membrane;GO:0005622//intracellular;GO:0044424//intracellular part;GO:0005737//cytoplasm;GO:0044464//cell part;GO:0005623//cell;GO:0044444//cytoplasmic part	GO:0051748//UTP-monosaccharide-1-phosphate uridylyltransferase activity;GO:0003824//catalytic activity;GO:0070569//uridylyltransferase activity;GO:0016772//transferase activity, transferring phosphorus-containing groups;GO:0016740//transferase activity;GO:0016779//nucleotidyltransferase activity	GO:0010035//response to inorganic substance;GO:0071496//cellular response to external stimulus;GO:0009605//response to external stimulus;GO:0052386//cell wall thickening;GO:0045229//external encapsulating structure organization;GO:0031668//cellular response to extracellular stimulus;GO:0009267//cellular response to starvation;GO:0042545//cell wall modification;GO:0009987//cellular process;GO:0044…
GRMZM2G032003_P05	1	1.17	0.796	0.963	1	1.25	0.806	1.05	1	1.19	0.805	0.94	GRMZM2G032003	0.267036	0.0113365	0.214422	0.294945	0.0242284	0.128763	TPA: UDP-glucose pyrophosphorylase1 [Zea mays]	Metabolism	Carbohydrate metabolism	ko00500//Starch and sucrose metabolism;ko00520//Amino sugar and nucleotide sugar metabolism;ko00040//Pentose and glucuronate interconversions;ko00052//Galactose metabolism	K00963	GO:0005737//cytoplasm;GO:0005623//cell;GO:0005622//intracellular;GO:0044424//intracellular part;GO:0016020//membrane;GO:0044444//cytoplasmic part;GO:0044464//cell part;GO:0042995//cell projection	GO:0003824//catalytic activity;GO:0016772//transferase activity, transferring phosphorus-containing groups;GO:0016779//nucleotidyltransferase activity;GO:0016740//transferase activity;GO:0051748//UTP-monosaccharide-1-phosphate uridylyltransferase activity;GO:0070569//uridylyltransferase activity	GO:0044763//single-organism cellular process;GO:0009628//response to abiotic stimulus;GO:0031668//cellular response to extracellular stimulus;GO:0042594//response to starvation;GO:0009605//response to external stimulus;GO:0045229//external encapsulating structure organization;GO:0044707//single-multicellular organism process;GO:0006970//response to osmotic stress;GO:0044699//single-organism proce…
GRMZM2G036921_P01	1	1.438	1.061	1.598	1	1.407	1.001	1.454	1	1.579	1.006	1.597	GRMZM2G036921	0.560389	0.00824541	0.214422	0.599622	0.00383874	0.0975827	peroxiredoxin-5 [Zea mays]	-	-	-	-	GO:0043227//membrane-bounded organelle;GO:0071944//cell periphery;GO:0044435//plastid part;GO:0005618//cell wall;GO:0044446//intracellular organelle part;GO:0009536//plastid;GO:0031967//organelle envelope;GO:0044424//intracellular part;GO:0009526//plastid envelope;GO:0043229//intracellular organelle;GO:0044422//organelle part;GO:0044444//cytoplasmic part;GO:0005622//intracellular;GO:0043226//orga…	GO:0016705//oxidoreductase activity, acting on paired donors, with incorporation or reduction of molecular oxygen;GO:0003824//catalytic activity;GO:0016209//antioxidant activity;GO:0016491//oxidoreductase activity	GO:0009605//response to external stimulus;GO:0043207//response to external biotic stimulus;GO:0051704//multi-organism process;GO:0008152//metabolic process;GO:0051707//response to other organism;GO:0009607//response to biotic stimulus;GO:0044699//single-organism process;GO:0044710//single-organism metabolic process;GO:0009617//response to bacterium;GO:0050896//response to stimulus
GRMZM2G047292_P01	1	0.737	1.524	1.012	1	0.782	1.337	1.081	1	0.845	1.541	1.195	GRMZM2G047292	-0.343732	0.0261877	0.265639	-0.420949	0.0395662	0.149819	PREDICTED: probable galactinol--sucrose galactosyltransferase 2 [Zea mays]	-	-	-	-	GO:0043227//membrane-bounded organelle;GO:0043231//intracellular membrane-bounded organelle;GO:0005622//intracellular;GO:0043229//intracellular organelle;GO:0044464//cell part;GO:0005623//cell;GO:0043226//organelle;GO:0044424//intracellular part	-	-
GRMZM2G066202_P01	1	0.72	0.946	0.45	1	0.847	0.89	0.335	1	0.705	0.962	0.441	GRMZM2G066202	-0.401	0.0399327	0.2942	-1.19044	0.00751606	0.0976975	LOC100285927 precursor [Zea mays]	-	-	-	-	GO:0043227//membrane-bounded organelle;GO:0044424//intracellular part;GO:0043231//intracellular membrane-bounded organelle;GO:0005622//intracellular;GO:0005623//cell;GO:0044464//cell part;GO:0043229//intracellular organelle;GO:0043226//organelle	-	-
GRMZM2G070087_P01	1	0.678	1.892	0.565	1	0.615	2.514	0.463	1	0.567	2.809	0.532	GRMZM2G070087	-0.68966	0.0113624	0.214422	-2.20945	0.0104365	0.104872	PREDICTED: inorganic phosphate transporter 1-2-like [Setaria italica]	-	-	-	-	GO:0043227//membrane-bounded organelle;GO:0044425//membrane part;GO:0031224//intrinsic component of membrane;GO:0016020//membrane;GO:0043231//intracellular membrane-bounded organelle;GO:0044424//intracellular part;GO:0005623//cell;GO:0043229//intracellular organelle;GO:0030054//cell junction;GO:0043226//organelle;GO:0005911//cell-cell junction;GO:0044464//cell part;GO:0005622//intracellular	GO:0005215//transporter activity;GO:0022804//active transmembrane transporter activity;GO:0015291//secondary active transmembrane transporter activity;GO:0022857//transmembrane transporter activity	GO:0001101//response to acid chemical;GO:0042221//response to chemical;GO:0044699//single-organism process;GO:0015698//inorganic anion transport;GO:0044765//single-organism transport;GO:0006810//transport;GO:0051234//establishment of localization;GO:0006811//ion transport;GO:0009987//cellular process;GO:0006820//anion transport;GO:0044763//single-organism cellular process;GO:0051179//localization…
GRMZM2G075438_P01	1	0.831	1.104	0.691	1	0.816	1.272	0.741	1	0.847	1.013	0.746	GRMZM2G075438	-0.266501	0.00337441	0.182766	-0.637856	0.0241261	0.128763	receptor-like protein kinase RK20-1 precursor [Zea mays]	-	-	-	-	GO:0043226//organelle;GO:0044424//intracellular part;GO:0043231//intracellular membrane-bounded organelle;GO:0043229//intracellular organelle;GO:0044464//cell part;GO:0005622//intracellular;GO:0043227//membrane-bounded organelle;GO:0005623//cell	GO:0003824//catalytic activity;GO:0016301//kinase activity;GO:0016740//transferase activity;GO:0036094//small molecule binding;GO:1901363//heterocyclic compound binding;GO:0032550//purine ribonucleoside binding;GO:0097367//carbohydrate derivative binding;GO:0001882//nucleoside binding;GO:0005488//binding;GO:0016773//phosphotransferase activity, alcohol group as acceptor;GO:0032549//ribonucleoside…	GO:0019538//protein metabolic process;GO:0044267//cellular protein metabolic process;GO:0044238//primary metabolic process;GO:0006464//cellular protein modification process;GO:0043412//macromolecule modification;GO:0008152//metabolic process;GO:0043170//macromolecule metabolic process;GO:0044237//cellular metabolic process;GO:0009987//cellular process;GO:0006793//phosphorus metabolic process;GO:0…
GRMZM2G078143_P01	1	1.226	0.911	1.186	1	1.27	0.843	1.156	1	1.301	0.845	1.166	GRMZM2G078143	0.339897	0.00532577	0.182766	0.432692	0.003747	0.0975827	hydroxymethyltransferase-like protein [Zea mays]	Metabolism	Metabolism of other amino acids;Carbohydrate metabolism;Global and Overview;Amino acid metabolism;Metabolism of cofactors and vitamins	ko01200//Carbon metabolism;ko01230//Biosynthesis of amino acids;ko00260//Glycine, serine and threonine metabolism;ko00630//Glyoxylate and dicarboxylate metabolism;ko00460//Cyanoamino acid metabolism;ko00670//One carbon pool by folate	K00600	GO:0005911//cell-cell junction;GO:0030054//cell junction;GO:0016020//membrane	GO:0003824//catalytic activity;GO:0016742//hydroxymethyl-, formyl- and related transferase activity;GO:0043167//ion binding;GO:0016740//transferase activity;GO:0043168//anion binding;GO:0005488//binding;GO:0016741//transferase activity, transferring one-carbon groups	GO:0032501//multicellular organismal process;GO:0006807//nitrogen compound metabolic process;GO:0009069//serine family amino acid metabolic process;GO:0044281//small molecule metabolic process;GO:0044710//single-organism metabolic process;GO:0006082//organic acid metabolic process;GO:0048284//organelle fusion;GO:0044767//single-organism developmental process;GO:1901564//organonitrogen compound me…
GRMZM2G083173_P01	1	1.538	1.029	1.296	1	1.282	1.08	1.407	1	1.333	1.076	1.371	GRMZM2G083173	0.469191	0.0282739	0.270748	0.355153	0.00162355	0.0789087	LOC100285573 [Zea mays]	-	-	-	-	GO:0044422//organelle part;GO:0005773//vacuole;GO:0005623//cell;GO:0044444//cytoplasmic part;GO:0000325//plant-type vacuole;GO:0043227//membrane-bounded organelle;GO:0044425//membrane part;GO:0044437//vacuolar part;GO:0043226//organelle;GO:0044464//cell part;GO:0005737//cytoplasm;GO:0031224//intrinsic component of membrane;GO:0043229//intracellular organelle;GO:0016020//membrane;GO:0043231//intra…	GO:0005215//transporter activity;GO:0022857//transmembrane transporter activity	GO:0044765//single-organism transport;GO:0051179//localization;GO:0009607//response to biotic stimulus;GO:0050896//response to stimulus;GO:0009987//cellular process;GO:0043207//response to external biotic stimulus;GO:0009605//response to external stimulus;GO:0044699//single-organism process;GO:0044763//single-organism cellular process;GO:0006810//transport;GO:1902578//single-organism localization…
GRMZM2G083173_P02	1	1.538	1.029	1.296	1	1.282	1.08	1.407	1	1.333	1.076	1.371	GRMZM2G083173	0.469191	0.0282739	0.270748	0.355153	0.00162355	0.0789087	LOC100285573 [Zea mays]	-	-	-	-	GO:0005773//vacuole;GO:0044424//intracellular part;GO:0044446//intracellular organelle part;GO:0005622//intracellular;GO:0044422//organelle part;GO:0044425//membrane part;GO:0005737//cytoplasm;GO:0043231//intracellular membrane-bounded organelle;GO:0005623//cell;GO:0000325//plant-type vacuole;GO:0043227//membrane-bounded organelle;GO:0044437//vacuolar part;GO:0043226//organelle;GO:0031224//intrin…	GO:0005215//transporter activity;GO:0022857//transmembrane transporter activity	GO:0051707//response to other organism;GO:0044699//single-organism process;GO:0051234//establishment of localization;GO:0051179//localization;GO:0009605//response to external stimulus;GO:0044765//single-organism transport;GO:0009607//response to biotic stimulus;GO:1902578//single-organism localization;GO:0051704//multi-organism process;GO:0009987//cellular process;GO:0043207//response to external…
GRMZM2G085078_P01	1	1.453	0.99	1.591	1	1.822	1.127	1.835	1	1.54	1.006	1.496	GRMZM2G085078	0.682573	0.0203419	0.255413	0.656312	0.00388125	0.0975827	PREDICTED: glutamate synthase 1 [NADH], chloroplastic-like isoform X1 [Zea mays]	Metabolism	Global and Overview;Energy metabolism;Amino acid metabolism	ko01230//Biosynthesis of amino acids;ko00250//Alanine, aspartate and glutamate metabolism;ko00910//Nitrogen metabolism	K00264	GO:0044424//intracellular part;GO:0044464//cell part;GO:0043227//membrane-bounded organelle;GO:0009536//plastid;GO:0009532//plastid stroma;GO:0043226//organelle;GO:0043229//intracellular organelle;GO:0044446//intracellular organelle part;GO:0005622//intracellular;GO:0044422//organelle part;GO:0005737//cytoplasm;GO:0043231//intracellular membrane-bounded organelle;GO:0044444//cytoplasmic part;GO:0…	GO:0016491//oxidoreductase activity;GO:1901265//nucleoside phosphate binding;GO:0003824//catalytic activity;GO:0046872//metal ion binding;GO:0016638//oxidoreductase activity, acting on the CH-NH2 group of donors;GO:0051540//metal cluster binding;GO:0000166//nucleotide binding;GO:0045181//glutamate synthase activity, NAD(P)H as acceptor;GO:0097367//carbohydrate derivative binding;GO:0097159//organ…	GO:1901576//organic substance biosynthetic process;GO:0042221//response to chemical;GO:0006082//organic acid metabolic process;GO:0050896//response to stimulus;GO:0044763//single-organism cellular process;GO:1901605//alpha-amino acid metabolic process;GO:0043436//oxoacid metabolic process;GO:0006807//nitrogen compound metabolic process;GO:0010035//response to inorganic substance;GO:0071704//organ…
GRMZM2G085078_P02	1	1.453	0.99	1.591	1	1.822	1.127	1.835	1	1.54	1.006	1.496	GRMZM2G085078	0.682573	0.0203419	0.255413	0.656312	0.00388125	0.0975827	PREDICTED: glutamate synthase 1 [NADH], chloroplastic-like isoform X1 [Zea mays]	Metabolism	Amino acid metabolism;Energy metabolism;Global and Overview	ko01230//Biosynthesis of amino acids;ko00250//Alanine, aspartate and glutamate metabolism;ko00910//Nitrogen metabolism	K00264	GO:0044444//cytoplasmic part;GO:0009536//plastid;GO:0043227//membrane-bounded organelle;GO:0005737//cytoplasm;GO:0044446//intracellular organelle part;GO:0005623//cell;GO:0009532//plastid stroma;GO:0043231//intracellular membrane-bounded organelle;GO:0005622//intracellular;GO:0044422//organelle part;GO:0043229//intracellular organelle;GO:0044464//cell part;GO:0044424//intracellular part;GO:004322…	GO:0045181//glutamate synthase activity, NAD(P)H as acceptor;GO:0016638//oxidoreductase activity, acting on the CH-NH2 group of donors;GO:0016491//oxidoreductase activity;GO:0051540//metal cluster binding;GO:0051536//iron-sulfur cluster binding;GO:0043169//cation binding;GO:0097367//carbohydrate derivative binding;GO:0000166//nucleotide binding;GO:1901363//heterocyclic compound binding;GO:0043167…	GO:0044283//small molecule biosynthetic process;GO:0050896//response to stimulus;GO:0044249//cellular biosynthetic process;GO:0009058//biosynthetic process;GO:0010035//response to inorganic substance;GO:0010038//response to metal ion;GO:0006520//cellular amino acid metabolic process;GO:0044281//small molecule metabolic process;GO:0008652//cellular amino acid biosynthetic process;GO:1901564//organ…
GRMZM2G100355_P02	1	0.737	1.524	1.012	1	0.782	1.337	1.081	1	0.845	1.541	1.195	GRMZM2G100355	-0.343732	0.0261877	0.265639	-0.420949	0.0395662	0.149819	stachyose synthase [Zea mays]	-	-	-	-	GO:0043229//intracellular organelle;GO:0043227//membrane-bounded organelle;GO:0044464//cell part;GO:0043231//intracellular membrane-bounded organelle;GO:0043226//organelle;GO:0005623//cell;GO:0044424//intracellular part;GO:0005622//intracellular	-	-
GRMZM2G121293_P01	1	0.733	1.014	0.805	1	0.772	1.082	0.761	1	0.681	1.02	0.632	GRMZM2G121293	-0.456669	0.0128527	0.218803	-0.503504	0.0385527	0.148563	subtilisin-like protease precursor [Zea mays]	-	-	-	-	GO:0005623//cell;GO:0071944//cell periphery;GO:0044464//cell part;GO:0043226//organelle;GO:0043231//intracellular membrane-bounded organelle;GO:0005618//cell wall;GO:0043229//intracellular organelle;GO:0043227//membrane-bounded organelle;GO:0030312//external encapsulating structure;GO:0044424//intracellular part;GO:0005622//intracellular;GO:0005576//extracellular region	GO:0008233//peptidase activity;GO:0005515//protein binding;GO:0005488//binding;GO:0004175//endopeptidase activity;GO:0070011//peptidase activity, acting on L-amino acid peptides;GO:0003824//catalytic activity;GO:0016787//hydrolase activity	GO:0010191//mucilage metabolic process;GO:0065009//regulation of molecular function;GO:0022414//reproductive process;GO:0071704//organic substance metabolic process;GO:0016485//protein processing;GO:0008152//metabolic process;GO:0044238//primary metabolic process;GO:0000003//reproduction;GO:0019538//protein metabolic process;GO:0006508//proteolysis;GO:0051604//protein maturation;GO:0044092//negat…
GRMZM2G125668_P01	1	0.837	1.197	0.868	1	0.69	0.978	0.668	1	0.779	1.052	0.882	GRMZM2G125668	-0.37957	0.0420064	0.294806	-0.416379	0.0405412	0.152296	mitochondrial NADH ubiquinone oxidoreductase 29 kDa subunit [Zea mays]	-	-	-	-	GO:0005622//intracellular;GO:0044424//intracellular part;GO:0043234//protein complex;GO:0031090//organelle membrane;GO:0044446//intracellular organelle part;GO:0043226//organelle;GO:1902494//catalytic complex;GO:0043229//intracellular organelle;GO:0019866//organelle inner membrane;GO:0044425//membrane part;GO:0030964//NADH dehydrogenase complex;GO:0032991//macromolecular complex;GO:0005737//cytop…	-	GO:0003006//developmental process involved in reproduction;GO:0009628//response to abiotic stimulus;GO:0000003//reproduction;GO:0022414//reproductive process;GO:0006950//response to stress;GO:0042221//response to chemical;GO:0032502//developmental process;GO:0006970//response to osmotic stress;GO:0050896//response to stimulus;GO:0001101//response to acid chemical
GRMZM2G127147_P01	1	0.628	1.246	0.719	1	0.552	1.133	0.806	1	0.436	1.186	0.601	GRMZM2G127147	-0.892535	0.0275856	0.270187	-0.74576	0.0338443	0.143056	PREDICTED: alkaline alpha galactosidase 2 isoform X1 [Zea mays]	Metabolism	Carbohydrate metabolism	ko00052//Galactose metabolism	K06617	-	GO:0003824//catalytic activity;GO:0016758//transferase activity, transferring hexosyl groups;GO:0016757//transferase activity, transferring glycosyl groups;GO:0008378//galactosyltransferase activity;GO:0016740//transferase activity	-
GRMZM2G127147_P02	1	0.628	1.246	0.719	1	0.552	1.133	0.806	1	0.436	1.186	0.601	GRMZM2G127147	-0.892535	0.0275856	0.270187	-0.74576	0.0338443	0.143056	PREDICTED: alkaline alpha galactosidase 2 isoform X1 [Zea mays]	Metabolism	Carbohydrate metabolism	ko00052//Galactose metabolism	K06617	-	GO:0003824//catalytic activity;GO:0016758//transferase activity, transferring hexosyl groups;GO:0008378//galactosyltransferase activity;GO:0016740//transferase activity;GO:0016757//transferase activity, transferring glycosyl groups	-
GRMZM2G127147_P03	1	0.628	1.246	0.719	1	0.552	1.133	0.806	1	0.436	1.186	0.601	GRMZM2G127147	-0.892535	0.0275856	0.270187	-0.74576	0.0338443	0.143056	alkaline alpha galactosidase 2 [Zea mays]	Metabolism	Carbohydrate metabolism	ko00052//Galactose metabolism	K06617	-	GO:0016757//transferase activity, transferring glycosyl groups;GO:0008378//galactosyltransferase activity;GO:0016758//transferase activity, transferring hexosyl groups;GO:0016740//transferase activity;GO:0003824//catalytic activity	-
GRMZM2G127350_P01	1	0.671	1.041	0.771	1	0.7	0.981	0.86	1	0.603	1.083	0.798	GRMZM2G127350	-0.603841	0.0109576	0.214422	-0.354231	0.0499353	0.158449	PREDICTED: alanine--glyoxylate aminotransferase 2 homolog 3, mitochondrial-like [Setaria italica]	Metabolism	Amino acid metabolism	ko00270//Cysteine and methionine metabolism;ko00260//Glycine, serine and threonine metabolism;ko00250//Alanine, aspartate and glutamate metabolism;ko00280//Valine, leucine and isoleucine degradation	K00827	GO:0005622//intracellular;GO:0043231//intracellular membrane-bounded organelle;GO:0005623//cell;GO:0044424//intracellular part;GO:0044464//cell part;GO:0043229//intracellular organelle;GO:0043226//organelle;GO:0043227//membrane-bounded organelle	GO:0016769//transferase activity, transferring nitrogenous groups;GO:0043168//anion binding;GO:0003824//catalytic activity;GO:0016740//transferase activity;GO:0043167//ion binding;GO:0005488//binding	GO:0007154//cell communication;GO:0009991//response to extracellular stimulus;GO:0009987//cellular process;GO:0031668//cellular response to extracellular stimulus;GO:0044699//single-organism process;GO:0071496//cellular response to external stimulus;GO:0009605//response to external stimulus;GO:0051716//cellular response to stimulus;GO:0031667//response to nutrient levels;GO:0050896//response to s…
GRMZM2G135108_P01	1	0.793	1.141	0.778	1	0.762	1.093	0.839	1	0.828	1.113	0.901	GRMZM2G135108	-0.332184	0.0106258	0.214422	-0.41059	0.0299986	0.139243	PREDICTED: peroxidase 5 [Zea mays]	Metabolism	Biosynthesis of other secondary metabolites	ko00940//Phenylpropanoid biosynthesis	K00430	GO:0005623//cell;GO:0043226//organelle;GO:0044464//cell part;GO:0043227//membrane-bounded organelle;GO:0043231//intracellular membrane-bounded organelle;GO:0005622//intracellular;GO:0044424//intracellular part;GO:0043229//intracellular organelle	GO:0046906//tetrapyrrole binding;GO:0097159//organic cyclic compound binding;GO:0003824//catalytic activity;GO:0043169//cation binding;GO:0016209//antioxidant activity;GO:0005488//binding;GO:0043167//ion binding;GO:1901363//heterocyclic compound binding	GO:0050896//response to stimulus;GO:0044699//single-organism process;GO:0006950//response to stress;GO:0008152//metabolic process;GO:0044710//single-organism metabolic process
GRMZM2G150212_P01	1	0.847	1.021	0.726	1	0.837	1.04	0.897	1	0.803	0.934	0.738	GRMZM2G150212	-0.270556	0.00733269	0.199096	-0.343158	0.0494887	0.157986	Os08g0407200 [Oryza sativa Japonica Group]	-	-	-	-	-	-	-
GRMZM2G150212_P02	1	0.847	1.021	0.726	1	0.837	1.04	0.897	1	0.803	0.934	0.738	GRMZM2G150212	-0.270556	0.00733269	0.199096	-0.343158	0.0494887	0.157986	Os08g0407200 [Oryza sativa Japonica Group]	-	-	-	-	-	-	-
GRMZM2G150212_P03	1	0.847	1.021	0.726	1	0.837	1.04	0.897	1	0.803	0.934	0.738	GRMZM2G150212	-0.270556	0.00733269	0.199096	-0.343158	0.0494887	0.157986	Os08g0407200 [Oryza sativa Japonica Group]	-	-	-	-	-	-	-
GRMZM2G150295_P01	1	1.183	0.963	1.35	1	1.274	1.069	1.309	1	1.259	0.928	1.36	GRMZM2G150295	0.308788	0.0113908	0.214422	0.441239	0.0295114	0.139243	glutaredoxin homolog1 [Zea mays]	-	-	-	-	GO:0005623//cell;GO:0044464//cell part;GO:0044424//intracellular part;GO:0005622//intracellular	GO:0016491//oxidoreductase activity;GO:0015036//disulfide oxidoreductase activity;GO:0003824//catalytic activity;GO:0016667//oxidoreductase activity, acting on a sulfur group of donors	GO:0042592//homeostatic process;GO:0065008//regulation of biological quality;GO:0044237//cellular metabolic process;GO:0065007//biological regulation;GO:0008152//metabolic process;GO:0044699//single-organism process;GO:0044763//single-organism cellular process;GO:0044710//single-organism metabolic process;GO:0006091//generation of precursor metabolites and energy;GO:0009987//cellular process;GO:0…
GRMZM2G152466_P01	1	0.795	0.846	0.467	1	0.8	0.702	0.483	1	0.737	0.844	0.454	GRMZM2G152466	-0.363395	0.0107161	0.214422	-0.768674	0.0210755	0.127808	tubulin alpha-3 chain [Zea mays]	Cellular Processes	Transport and catabolism	ko04145//Phagosome	K07374	GO:0043226//organelle;GO:0005623//cell;GO:0044424//intracellular part;GO:0043228//non-membrane-bounded organelle;GO:0005856//cytoskeleton;GO:0015630//microtubule cytoskeleton;GO:0044464//cell part;GO:0043232//intracellular non-membrane-bounded organelle;GO:0032991//macromolecular complex;GO:0005622//intracellular;GO:0043229//intracellular organelle	GO:0003824//catalytic activity;GO:0016818//hydrolase activity, acting on acid anhydrides, in phosphorus-containing anhydrides;GO:0017111//nucleoside-triphosphatase activity;GO:0036094//small molecule binding;GO:0005198//structural molecule activity;GO:1901363//heterocyclic compound binding;GO:0001883//purine nucleoside binding;GO:0097159//organic cyclic compound binding;GO:0016462//pyrophosphatas…	GO:0006753//nucleoside phosphate metabolic process;GO:0055086//nucleobase-containing small molecule metabolic process;GO:0009150//purine ribonucleotide metabolic process;GO:0071840//cellular component organization or biogenesis;GO:1901135//carbohydrate derivative metabolic process;GO:0019439//aromatic compound catabolic process;GO:0046483//heterocycle metabolic process;GO:0044248//cellular catabo…
GRMZM2G152466_P03	1	0.795	0.846	0.467	1	0.8	0.702	0.483	1	0.737	0.844	0.454	GRMZM2G152466	-0.363395	0.0107161	0.214422	-0.768674	0.0210755	0.127808	tubulin alpha-3 chain [Zea mays]	Cellular Processes	Transport and catabolism	ko04145//Phagosome	K07374	GO:0043226//organelle;GO:0043232//intracellular non-membrane-bounded organelle;GO:0032991//macromolecular complex;GO:0005856//cytoskeleton;GO:0043228//non-membrane-bounded organelle;GO:0044464//cell part;GO:0005622//intracellular;GO:0015630//microtubule cytoskeleton;GO:0043229//intracellular organelle;GO:0005623//cell;GO:0044424//intracellular part	GO:0032549//ribonucleoside binding;GO:0003824//catalytic activity;GO:1901363//heterocyclic compound binding;GO:0016817//hydrolase activity, acting on acid anhydrides;GO:0016462//pyrophosphatase activity;GO:0005488//binding;GO:0005198//structural molecule activity;GO:0016818//hydrolase activity, acting on acid anhydrides, in phosphorus-containing anhydrides;GO:0036094//small molecule binding;GO:00…	GO:0046434//organophosphate catabolic process;GO:0006195//purine nucleotide catabolic process;GO:0006793//phosphorus metabolic process;GO:0044270//cellular nitrogen compound catabolic process;GO:0019693//ribose phosphate metabolic process;GO:0044237//cellular metabolic process;GO:1901360//organic cyclic compound metabolic process;GO:1901292//nucleoside phosphate catabolic process;GO:0022607//cell…
GRMZM2G153292_P01	1	0.795	0.846	0.467	1	0.8	0.702	0.483	1	0.737	0.844	0.454	GRMZM2G153292	-0.363395	0.0107161	0.214422	-0.768674	0.0210755	0.127808	tubulin alpha-1 chain-like [Zea mays]	Cellular Processes	Transport and catabolism	ko04145//Phagosome	K07374	GO:0043226//organelle;GO:0044424//intracellular part;GO:0043232//intracellular non-membrane-bounded organelle;GO:0005623//cell;GO:0032991//macromolecular complex;GO:0005856//cytoskeleton;GO:0044464//cell part;GO:0043228//non-membrane-bounded organelle;GO:0015630//microtubule cytoskeleton;GO:0005622//intracellular;GO:0043229//intracellular organelle	GO:0001882//nucleoside binding;GO:0016787//hydrolase activity;GO:0017111//nucleoside-triphosphatase activity;GO:0097159//organic cyclic compound binding;GO:0032549//ribonucleoside binding;GO:0097367//carbohydrate derivative binding;GO:0005198//structural molecule activity;GO:0016817//hydrolase activity, acting on acid anhydrides;GO:0032550//purine ribonucleoside binding;GO:1901363//heterocyclic c…	GO:0044710//single-organism metabolic process;GO:0034641//cellular nitrogen compound metabolic process;GO:1901360//organic cyclic compound metabolic process;GO:0008152//metabolic process;GO:0006725//cellular aromatic compound metabolic process;GO:0044699//single-organism process;GO:0044237//cellular metabolic process;GO:0019439//aromatic compound catabolic process;GO:0034622//cellular macromolecu…
GRMZM2G153292_P02	1	0.795	0.846	0.467	1	0.8	0.702	0.483	1	0.737	0.844	0.454	GRMZM2G153292	-0.363395	0.0107161	0.214422	-0.768674	0.0210755	0.127808	tubulin alpha-1 chain-like [Zea mays]	Cellular Processes	Transport and catabolism	ko04145//Phagosome	K07374	GO:0044464//cell part;GO:0005856//cytoskeleton;GO:0032991//macromolecular complex;GO:0043232//intracellular non-membrane-bounded organelle;GO:0015630//microtubule cytoskeleton;GO:0043229//intracellular organelle;GO:0043226//organelle;GO:0044424//intracellular part;GO:0005622//intracellular;GO:0005623//cell;GO:0043228//non-membrane-bounded organelle	GO:0016817//hydrolase activity, acting on acid anhydrides;GO:0016462//pyrophosphatase activity;GO:0001883//purine nucleoside binding;GO:0016818//hydrolase activity, acting on acid anhydrides, in phosphorus-containing anhydrides;GO:0036094//small molecule binding;GO:0017111//nucleoside-triphosphatase activity;GO:0005488//binding;GO:0032549//ribonucleoside binding;GO:0097159//organic cyclic compoun…	GO:0043933//macromolecular complex subunit organization;GO:0072521//purine-containing compound metabolic process;GO:0006753//nucleoside phosphate metabolic process;GO:1901575//organic substance catabolic process;GO:0006139//nucleobase-containing compound metabolic process;GO:0009117//nucleotide metabolic process;GO:0046700//heterocycle catabolic process;GO:0008152//metabolic process;GO:0044699//s…
GRMZM2G153292_P03	1	0.795	0.846	0.467	1	0.8	0.702	0.483	1	0.737	0.844	0.454	GRMZM2G153292	-0.363395	0.0107161	0.214422	-0.768674	0.0210755	0.127808	tubulin alpha-1 chain-like [Zea mays]	Cellular Processes	Transport and catabolism	ko04145//Phagosome	K07374	GO:0044464//cell part;GO:0015630//microtubule cytoskeleton;GO:0005622//intracellular;GO:0043228//non-membrane-bounded organelle;GO:0005623//cell;GO:0044424//intracellular part;GO:0043226//organelle;GO:0032991//macromolecular complex;GO:0005856//cytoskeleton;GO:0043229//intracellular organelle;GO:0043232//intracellular non-membrane-bounded organelle	GO:0005488//binding;GO:0001882//nucleoside binding;GO:0016462//pyrophosphatase activity;GO:0032549//ribonucleoside binding;GO:0016818//hydrolase activity, acting on acid anhydrides, in phosphorus-containing anhydrides;GO:0036094//small molecule binding;GO:1901363//heterocyclic compound binding;GO:0097367//carbohydrate derivative binding;GO:0005198//structural molecule activity;GO:0097159//organic…	GO:0034622//cellular macromolecular complex assembly;GO:1901575//organic substance catabolic process;GO:0044237//cellular metabolic process;GO:0019439//aromatic compound catabolic process;GO:0044085//cellular component biogenesis;GO:1901292//nucleoside phosphate catabolic process;GO:0009150//purine ribonucleotide metabolic process;GO:0006163//purine nucleotide metabolic process;GO:0006796//phosph…
GRMZM2G153292_P04	1	0.795	0.846	0.467	1	0.8	0.702	0.483	1	0.737	0.844	0.454	GRMZM2G153292	-0.363395	0.0107161	0.214422	-0.768674	0.0210755	0.127808	tubulin alpha-1 chain-like [Zea mays]	Cellular Processes	Transport and catabolism	ko04145//Phagosome	K07374	GO:0015630//microtubule cytoskeleton;GO:0032991//macromolecular complex;GO:0043229//intracellular organelle;GO:0044464//cell part;GO:0043232//intracellular non-membrane-bounded organelle;GO:0043226//organelle;GO:0043228//non-membrane-bounded organelle;GO:0005622//intracellular;GO:0005856//cytoskeleton;GO:0044424//intracellular part;GO:0005623//cell	GO:0001882//nucleoside binding;GO:0016817//hydrolase activity, acting on acid anhydrides;GO:0032550//purine ribonucleoside binding;GO:0016787//hydrolase activity;GO:0005488//binding;GO:0016462//pyrophosphatase activity;GO:1901363//heterocyclic compound binding;GO:0032549//ribonucleoside binding;GO:0003824//catalytic activity;GO:0017111//nucleoside-triphosphatase activity;GO:0097367//carbohydrate …	GO:0009056//catabolic process;GO:0044710//single-organism metabolic process;GO:0034622//cellular macromolecular complex assembly;GO:0009987//cellular process;GO:0044248//cellular catabolic process;GO:1901135//carbohydrate derivative metabolic process;GO:0006163//purine nucleotide metabolic process;GO:0009154//purine ribonucleotide catabolic process;GO:0006139//nucleobase-containing compound metab…
GRMZM2G153292_P08	1	0.795	0.846	0.467	1	0.8	0.702	0.483	1	0.737	0.844	0.454	GRMZM2G153292	-0.363395	0.0107161	0.214422	-0.768674	0.0210755	0.127808	PREDICTED: tubulin alpha-2 chain [Zea mays]	Cellular Processes	Transport and catabolism	ko04145//Phagosome	K07374	GO:0005856//cytoskeleton;GO:0043232//intracellular non-membrane-bounded organelle;GO:0015630//microtubule cytoskeleton;GO:0044464//cell part;GO:0043226//organelle;GO:0043228//non-membrane-bounded organelle;GO:0005623//cell;GO:0032991//macromolecular complex;GO:0043229//intracellular organelle;GO:0005622//intracellular;GO:0044424//intracellular part	GO:0016818//hydrolase activity, acting on acid anhydrides, in phosphorus-containing anhydrides;GO:0032550//purine ribonucleoside binding;GO:0001883//purine nucleoside binding;GO:0003824//catalytic activity;GO:0097159//organic cyclic compound binding;GO:0036094//small molecule binding;GO:0097367//carbohydrate derivative binding;GO:0016817//hydrolase activity, acting on acid anhydrides;GO:0001882//…	GO:0006163//purine nucleotide metabolic process;GO:0044238//primary metabolic process;GO:0006807//nitrogen compound metabolic process;GO:1901565//organonitrogen compound catabolic process;GO:1901136//carbohydrate derivative catabolic process;GO:0044248//cellular catabolic process;GO:0019693//ribose phosphate metabolic process;GO:0043933//macromolecular complex subunit organization;GO:0071704//org…
GRMZM2G156684_P01	1	0.873	1.641	0.769	1	0.795	1.412	0.684	1	0.799	1.557	0.825	GRMZM2G156684	-0.282205	0.0230923	0.258488	-1.017	0.00269001	0.0975827	PREDICTED: HIPL1 protein-like [Setaria italica]	-	-	-	-	GO:0005623//cell;GO:0043227//membrane-bounded organelle;GO:0043231//intracellular membrane-bounded organelle;GO:0043226//organelle;GO:0044424//intracellular part;GO:0044464//cell part;GO:0005622//intracellular;GO:0043229//intracellular organelle	GO:0016614//oxidoreductase activity, acting on CH-OH group of donors;GO:0048037//cofactor binding;GO:0016491//oxidoreductase activity;GO:0003824//catalytic activity;GO:0005488//binding	GO:0008152//metabolic process;GO:0044699//single-organism process;GO:0044238//primary metabolic process;GO:0044710//single-organism metabolic process
GRMZM2G157683_P01	1	0.56	0.986	0.645	1	0.578	1.012	0.605	1	0.617	0.957	0.665	GRMZM2G157683	-0.773491	0.00281284	0.182766	-0.625814	0.00997764	0.104872	NADPH quinone oxidoreductase 1 [Zea mays]	-	-	-	-	GO:0005737//cytoplasm;GO:0044435//plastid part;GO:0043227//membrane-bounded organelle;GO:0043231//intracellular membrane-bounded organelle;GO:0009536//plastid;GO:0044424//intracellular part;GO:0044446//intracellular organelle part;GO:0044444//cytoplasmic part;GO:0009532//plastid stroma;GO:0005623//cell;GO:0016020//membrane;GO:0044422//organelle part;GO:0043229//intracellular organelle;GO:0043226/…	GO:0016651//oxidoreductase activity, acting on NAD(P)H;GO:0016491//oxidoreductase activity;GO:0016655//oxidoreductase activity, acting on NAD(P)H, quinone or similar compound as acceptor;GO:0003824//catalytic activity	GO:0051707//response to other organism;GO:0044710//single-organism metabolic process;GO:0006970//response to osmotic stress;GO:0009628//response to abiotic stimulus;GO:0009617//response to bacterium;GO:0043207//response to external biotic stimulus;GO:0006950//response to stress;GO:0008152//metabolic process;GO:0009607//response to biotic stimulus;GO:0051704//multi-organism process;GO:0044699//sin…
GRMZM2G304712_P01	1	0.677	0.827	1.147	1	0.813	0.929	1.227	1	0.815	0.758	1.199	GRMZM2G304712	-0.380196	0.0489994	0.294806	0.507151	0.0222891	0.127808	limonoid UDP-glucosyltransferase [Zea mays]	-	-	-	-	-	GO:0016740//transferase activity;GO:0003824//catalytic activity;GO:0016757//transferase activity, transferring glycosyl groups;GO:0008194//UDP-glycosyltransferase activity	GO:0009411//response to UV;GO:0009416//response to light stimulus;GO:0009314//response to radiation;GO:0050896//response to stimulus;GO:0009628//response to abiotic stimulus
GRMZM2G320298_P01	1	0.763	1.021	0.784	1	0.659	0.993	0.694	1	0.754	0.984	0.687	GRMZM2G320298	-0.463284	0.0204807	0.255413	-0.469633	0.00916859	0.102053	PREDICTED: probable carboxylesterase 15 [Zea mays]	-	-	-	-	-	GO:0003824//catalytic activity	-
GRMZM2G341410_P01	1	0.667	1.422	0.763	1	0.659	1.735	0.779	1	0.597	1.453	0.84	GRMZM2G341410	-0.641604	0.006145	0.189779	-0.952593	0.0127728	0.117586	PREDICTED: leucine-rich repeat extensin-like protein 6 [Zea mays]	-	-	-	-	GO:0005623//cell;GO:0043227//membrane-bounded organelle;GO:0044464//cell part;GO:0044424//intracellular part;GO:0005622//intracellular;GO:0043226//organelle;GO:0043231//intracellular membrane-bounded organelle;GO:0043229//intracellular organelle	GO:0016740//transferase activity;GO:0003824//catalytic activity;GO:0016772//transferase activity, transferring phosphorus-containing groups	GO:0006796//phosphate-containing compound metabolic process;GO:0006793//phosphorus metabolic process;GO:0009987//cellular process;GO:0008152//metabolic process;GO:0044237//cellular metabolic process
GRMZM2G342246_P01	1	0.617	0.869	0.69	1	0.461	0.849	0.518	1	0.647	0.902	0.554	GRMZM2G342246	-0.798366	0.0335063	0.28055	-0.572353	0.0431114	0.15298	TPA: beta-expansin 7 Precursor [Zea mays]	-	-	-	-	GO:0043231//intracellular membrane-bounded organelle;GO:0043229//intracellular organelle;GO:0044464//cell part;GO:0043226//organelle;GO:0044424//intracellular part;GO:0030312//external encapsulating structure;GO:0043227//membrane-bounded organelle;GO:0005622//intracellular;GO:0005623//cell;GO:0071944//cell periphery	-	GO:0000003//reproduction
GRMZM2G405459_P01	1	0.758	1.094	0.569	1	0.713	1.009	0.602	1	0.72	1.097	0.592	GRMZM2G405459	-0.453373	0.0036208	0.182766	-0.860039	0.00470679	0.0975827	PREDICTED: peroxidase P7-like [Setaria italica]	Metabolism	Biosynthesis of other secondary metabolites	ko00940//Phenylpropanoid biosynthesis	K00430	-	GO:0046906//tetrapyrrole binding;GO:0005488//binding;GO:0043169//cation binding;GO:0016209//antioxidant activity;GO:0043167//ion binding;GO:0003824//catalytic activity;GO:0097159//organic cyclic compound binding;GO:1901363//heterocyclic compound binding	GO:0008152//metabolic process;GO:0006950//response to stress;GO:0044710//single-organism metabolic process;GO:0044699//single-organism process;GO:0050896//response to stimulus
GRMZM2G405459_P02	1	0.758	1.094	0.569	1	0.713	1.009	0.602	1	0.72	1.097	0.592	GRMZM2G405459	-0.453373	0.0036208	0.182766	-0.860039	0.00470679	0.0975827	PREDICTED: peroxidase P7-like [Setaria italica]	Metabolism	Biosynthesis of other secondary metabolites	ko00940//Phenylpropanoid biosynthesis	K00430	-	GO:0043169//cation binding;GO:0005488//binding;GO:0097159//organic cyclic compound binding;GO:0016209//antioxidant activity;GO:1901363//heterocyclic compound binding;GO:0046906//tetrapyrrole binding;GO:0003824//catalytic activity;GO:0043167//ion binding	GO:0006950//response to stress;GO:0044699//single-organism process;GO:0050896//response to stimulus;GO:0008152//metabolic process;GO:0044710//single-organism metabolic process
GRMZM2G453805_P01	1	1.356	1.183	0.921	1	1.314	1.295	0.987	1	1.542	1.28	1.008	GRMZM2G453805	0.489543	0.0204579	0.255413	-0.365974	0.00142408	0.0789087	chitinase chem5 precursor [Zea mays]	Metabolism	Carbohydrate metabolism	ko00520//Amino sugar and nucleotide sugar metabolism	K01183	GO:0043231//intracellular membrane-bounded organelle;GO:0043226//organelle;GO:0043229//intracellular organelle;GO:0044464//cell part;GO:0005622//intracellular;GO:0044424//intracellular part;GO:0005623//cell;GO:0043227//membrane-bounded organelle	GO:0003824//catalytic activity;GO:0004553//hydrolase activity, hydrolyzing O-glycosyl compounds;GO:0016787//hydrolase activity;GO:0016798//hydrolase activity, acting on glycosyl bonds	GO:0008152//metabolic process;GO:0044238//primary metabolic process
GRMZM2G462140_P01	1	1.268	0.913	1.048	1	1.279	0.857	1.066	1	1.327	0.887	1.156	GRMZM2G462140	0.368861	0.00296615	0.182766	0.299492	0.0306227	0.139243	PREDICTED: dihydrolipoyl dehydrogenase 1, mitochondrial-like [Zea mays]	Metabolism	Carbohydrate metabolism;Global and Overview;Amino acid metabolism	ko01200//Carbon metabolism;ko00010//Glycolysis / Gluconeogenesis;ko00260//Glycine, serine and threonine metabolism;ko00630//Glyoxylate and dicarboxylate metabolism;ko00620//Pyruvate metabolism;ko00020//Citrate cycle (TCA cycle);ko00280//Valine, leucine and isoleucine degradation;ko00640//Propanoate metabolism	K00382	GO:0031975//envelope;GO:0005739//mitochondrion;GO:0019866//organelle inner membrane;GO:0005622//intracellular;GO:0070469//respiratory chain;GO:0031966//mitochondrial membrane;GO:0044455//mitochondrial membrane part;GO:0005623//cell;GO:0044446//intracellular organelle part;GO:0031090//organelle membrane;GO:0005743//mitochondrial inner membrane;GO:0044444//cytoplasmic part;GO:0005746//mitochondrial…	GO:0043169//cation binding;GO:0016491//oxidoreductase activity;GO:0016651//oxidoreductase activity, acting on NAD(P)H;GO:0032549//ribonucleoside binding;GO:0097159//organic cyclic compound binding;GO:0046872//metal ion binding;GO:0036094//small molecule binding;GO:0016667//oxidoreductase activity, acting on a sulfur group of donors;GO:0005488//binding;GO:0046914//transition metal ion binding;GO:0…	GO:0042592//homeostatic process;GO:0044237//cellular metabolic process;GO:0065008//regulation of biological quality;GO:0065007//biological regulation;GO:0044710//single-organism metabolic process;GO:0050896//response to stimulus;GO:0019725//cellular homeostasis;GO:0010038//response to metal ion;GO:0010035//response to inorganic substance;GO:0042221//response to chemical;GO:0006091//generation of …
GRMZM5G868679_P01	1	0.801	0.983	0.687	1	0.874	1.104	0.642	1	0.808	0.993	0.669	GRMZM5G868679	-0.272878	0.02067	0.256285	-0.624374	0.0165068	0.127808	PREDICTED: nucleotide pyrophosphatase/phosphodiesterase isoform X1 [Zea mays]	-	-	-	-	-	GO:0042578//phosphoric ester hydrolase activity;GO:0016788//hydrolase activity, acting on ester bonds;GO:0043167//ion binding;GO:0016787//hydrolase activity;GO:0003824//catalytic activity;GO:0005488//binding;GO:0043169//cation binding;GO:0016791//phosphatase activity	GO:0009987//cellular process;GO:0006793//phosphorus metabolic process;GO:0006796//phosphate-containing compound metabolic process;GO:0044237//cellular metabolic process;GO:0008152//metabolic process
Note：
Symbol: GeneID;
CK-724-1_116: protein relative expression level of the first replicate of control-treated Jing724 labeled with iTRAQ tag 116;
T-724-1_114: protein relative expression level of the first replicate of salt-treated Jing724 labeled with iTRAQ tag 114;
D9H-CK-1_115: protein relative expression level of the first replicate of control-treated D9H labeled with iTRAQ tag 115;
D9H-T-1_113: protein relative expression level of the first replicate of salt-treated D9H labeled with iTRAQ tag 113;
CK-724-2_116: protein relative expression level of the second replicate of control-treated Jing724 labeled with iTRAQ tag 116;
T-724-2_114: protein relative expression level of the second replicate of salt-treated Jing724 labeled with iTRAQ tag 114;
D9H-CK-2_115: protein relative expression level of the second replicate of control-treated D9H labeled with iTRAQ tag 115;
D9H-T-2_113: protein relative expression level of the second replicate of salt-treated D9H labeled with iTRAQ tag 113;
CK-724-3_116: protein relative expression level of the third replicate of control-treated Jing724 labeled with iTRAQ tag 116;
T-724-3_114: protein relative expression level of the third replicate of salt-treated Jing724 labeled with iTRAQ tag 114;
D9H-CK-3_115: protein relative expression level of the third replicate of control-treated D9H labeled with iTRAQ tag 115;
D9H-T-3_113: protein relative expression level of the third replicate of salt-treated D9H labeled with iTRAQ tag 113;
log2_FC(T-724/CK-724): protein fold change of salt treated Jing724 to control treated Jing724 based on log2 scale;
log2_FC(D9H-T/D9H-CK): protein fold change of salt treated D9H to control treated D9H based on log2 scale;
fdr: false discovery rate;
K_ID: KEGG Orthology ID;
GO Component: component classification of gene ontology (GO);
GO Function: function classification of GO;
GO Process: process classification of GO;
